## Programming mRNA decay to modulate synthetic circuit resource allocation

Ophelia S. Venturelli<sup>12\*</sup>, Mika Tei<sup>12</sup>, Stefan Bauer<sup>3</sup>, Leanne Jade G. Chan<sup>4</sup>, Christopher J. Petzold<sup>4</sup> and Adam P. Arkin<sup>1235\*</sup>

<sup>1</sup> California Institute for Quantitative Biosciences, University of California Berkeley, Berkeley CA

<sup>2</sup> Department of Bioengineering, University of California Berkeley, Berkeley CA

<sup>3</sup> Energy Biosciences Institute, University of California Berkeley, Berkeley CA

<sup>4</sup> Joint BioEnergy Institute and Biological Systems and Engineering Division, Lawrence Berkeley National Laboratory, Berkeley CA

<sup>5</sup> Environmental Genomics and Systems Biology, Lawrence Berkeley National Laboratory, Berkeley CA

\*To whom correspondence should be addressed: [aparkin@lbl.gov](mailto:aparkin@lbl.gov), [venturelli@wisc.edu](mailto:venturelli@wisc.edu)

## **ABSTRACT**

Synthetic biomolecular networks embedded in host-cells compete with cellular processes for limited intracellular resources. Resource utilization is a major variable that impacts synthetic circuit behavior. Here we show that intracellular resources could be diverted from cellular operations to a synthetic circuit by programming global mRNA decay using the sequence-dependent endoribonuclease MazF. Synthetic circuit genes were protected from MazF activity by recoding the gene sequence to eliminate recognition sites, while preserving the amino acid sequence. The expression of a protected fluorescent reporter and the metabolic flux of a high-value metabolite gluconate were significantly enhanced using this genome-scale control strategy. Proteomics measurements discovered a key host translation factor in need of protection to optimize the resource redistribution activity. A dynamic computational model demonstrated that the MazF mRNA-decay feedback loop achieved proportional control of MazF levels in an optimal operating regime. RNA-seq time-series measurements of MazF-induced cells elucidated the dynamic shifts in the transcript abundance and discovered regulatory design elements that could be used to expand the control mechanisms of the MazF resource allocator. Together, these results demonstrated that manipulation of resource allocation is a tunable parameter that can be used to redirect resources away from cellular processes to synthetic circuits to enhance target functions.

## INTRODUCTION

1 Engineered biological systems have diverse applications in medicine, bioenergy, and  
2 agriculture<sup>1</sup>. Novel cellular behaviors can be programmed by interacting networks of  
3 biomolecules to process information from the environment and execute target functions. These  
4 synthetic biomolecular circuits interact with endogenous cellular processes through competition  
5 over shared resources that include ribosomes, tRNAs, polymerases, amino acids, and  
6 nucleotides<sup>2</sup>. Resource utilization influences the predictability, function, and evolutionary stability  
7 of engineered networks and constrains the achievable parameter space for synthetic circuit  
8 design<sup>3</sup>.

9  
10 Cells operate with a limited resource quota, which produces a trade-off in the partitioning of  
11 energy between cellular processes and synthetic circuit functions<sup>1,2,4,5</sup>. A core challenge is to  
12 rewire cellular regulation to optimally distribute resources between the host-cell and synthetic  
13 circuit processes. While there are numerous mechanisms to control target gene expression  
14 including engineered promoters<sup>6</sup>, protein degradation<sup>7</sup> or CRISPRi<sup>8-10</sup>, limited technologies exist  
15 to globally redistribute resources and re-program cellular state. Novel strategies should be  
16 developed to manipulate genome-wide gene expression patterns to optimize a target function.

17  
18 RNA degradation more rapidly and efficiently redistributes ribosomes, a crucial limiting resource  
19 in *E. coli*<sup>5,11</sup>, compared to transcriptional control. Viruses capitalize on mRNA decay to reduce  
20 competition for the host-cell translational machinery during developmental transitions and  
21 implement temporal gene expression programs<sup>12,13</sup>. To exploit RNA decay for synthetic circuit  
22 resource redistribution in *E. coli*, we repurposed a sequence-specific ribonuclease MazF whose  
23 recognition site 'ACA' is present in 96% of *E. coli* coding sequences. The MazF recognition site  
24 can be eliminated from the synthetic circuit while preserving the amino acid content, allowing  
25 cellular resources to be re-allocated towards synthetic gene expression by eliminating nearly all  
26 competing processes.

27  
28 Here we show that the MazF resource allocator controllably redistributed core cellular  
29 subsystems to support a synthetic circuit and an engineered metabolic pathway. The former  
30 was further enhanced by protection of specific host-cell factors and use of the orthogonal RNA  
31 polymerase from T7 to transcribe genes in the synthetic circuit. Shotgun proteomics  
32 measurements were used to identify a host factor in need of protection to prevent loss of  
33 translational efficiency following MazF induction. Our results demonstrated that an mRNA-decay

34 feedback loop was a critical design element for the resource allocator and a dynamic  
35 computational model was used to explore the role of feedback in this system. RNA-seq  
36 measurements elucidated the relationship between the number of MazF sites and the decay  
37 rate of the transcriptome and provided insights into the physiological impact of MazF  
38 expression. Further, these data pinpointed regulatory sequences that respond to changes in  
39 MazF activity and could be used to expand the control mechanisms of the MazF resource  
40 allocator. In sum, these results suggest a platform for global manipulation of resource pools as a  
41 key parameter for modulating synthetic circuit behavior.

42

## 43 RESULTS

### 44 *Characterization of inducible MazF for resource allocator design*

45 To explore whether manipulation of resource allocation could predictably modulate circuit  
46 behavior, we needed to develop a comprehensive reallocation mechanism that preserved core  
47 processes required for a target function while downregulating competing pathways. MazF is a  
48 sequence-dependent and ribosome-independent endoribonuclease that cleaves the recognition  
49 site 'ACA' in single-stranded RNA<sup>14</sup>. 96% of *E. coli* coding sequences contain at least one MazF  
50 recognition site (Supplementary Fig. 1). Thus, induction of MazF should inhibit cellular  
51 processes other than those protected from its action.

52

53 We characterized the impact of MazF on expression of a target gene *mCherry* that contained 9  
54 recognition sites in the coding sequence (*mCherry-U*) or was recoded to not contain any sites  
55 using alternative codons (*mCherry-P*). *mazF* was introduced into an intergenic genomic site  
56 under control of an aTc-inducible promoter ( $P_{TET}$ ) in an *E. coli* strain deleted for *mazF* (see  
57 Materials and Methods). mCherry-P and mCherry-U were expressed at similar levels in the  
58 absence of MazF, indicating that recoding the transcript did not significantly modify expression  
59 levels (Figure 1b). The MazF induction ratio, defined as the fold change of mCherry-P  
60 expression in the presence to absence of MazF, is a metric used to quantify resource  
61 redistribution activity. Following 10 hr of induction with 0 or 5 ng/ml aTc, the MazF induction  
62 ratio was <1 for mCherry-U and 5 for mCherry-P (Figure 1c). The sequence protection ratio,  
63 defined as the ratio of mCherry-P to mCherry-U, was approximately 1 or 19 in the absence or  
64 presence of MazF (Figure 1d). Together, these data show that MazF significantly enhanced  
65 protected and inhibited unprotected gene expression.

66

67 To map the relationship between MazF expression and resource redistribution activity, growth

68 and mCherry-X (X denotes U or P) expression were measured across a broad range of aTc  
69 concentrations. The expression of mCherry-U driven by an arabinose-inducible promoter ( $P_{BAD}$ )  
70 was reduced up to 4-fold in response to aTc (Supplementary Figure 2). The MazF induction  
71 ratio of total fluorescence increased (Figure 1e), whereas the total biomass (OD600) decreased  
72 as a function aTc (Supplementary Figure 3a). The MazF induction ratio of mCherry fluorescence  
73 normalized by OD600 similarly increased with aTc and arabinose, indicating that the biomass  
74 normalization factor did not alter the qualitative relationship between MazF activity and  
75 mCherry-P expression (Supplementary Figure 3b). These data highlight that mCherry-P  
76 expression and biomass synthesis were inversely correlated in response to MazF.

77

78 To measure if the expression of mCherry-P degraded as a function of time in MazF-induced  
79 cells, cell populations were induced with mCherry-P at three time points following exposure to  
80 MazF. To compare expression across conditions, mCherry-P fluorescence was divided by  
81 biomass and normalized to the maximum expression level across all conditions following 12 hr  
82 of induction with 5 ng/ml aTc. In the absence of MazF, delayed induction by 2 hr reduced  
83 mCherry-P expression by 85% (Supplementary Figure 4a), whereas cells induced with MazF  
84 displayed a 34% decrease in mCherry-P expression (Supplementary Figure 4b). These data  
85 indicate that heterologous expression was significantly attenuated by delayed induction in the  
86 absence of MazF. By contrast, delays in the induction of mCherry-P reduced expression by a  
87 smaller magnitude in the presence of MazF, indicating that MazF-induced cells preserved high  
88 metabolic activity for a period of time.

89

90 To distinguish whether transcriptional or translation activity dominated the enhancement of  
91 mCherry-P in response to MazF, *mCherry-P* mRNA was measured using quantitative real-time  
92 PCR (qPCR). The *mCherry-P* mRNA fold change following 56 min of induction with 0 or 5 ng/ml  
93 aTc relative to *mCherry-P* mRNA abundance at the beginning of the experiment ( $t = 0$ ) was  
94 similar in the presence or absence of MazF (Supplementary Figure 5). These data show that  
95 MazF did not significantly alter the *mCherry-P* transcription rate over this period of time.  
96 Therefore, these results suggest that MazF activity augmented the translation rate of *mCherry-P*  
97 relative to *mCherry-U*.

98

### 99 *Enhancement of gluconate production using the MazF resource allocator*

100 The gluconate pathway competes directly with biomass synthesis by redirecting glucose into  
101 gluconate via glucose dehydrogenase (Gdh, Figure 2a). To determine the impact of MazF on

102 metabolic flux, biomass and gluconate were measured as a function of time (see Materials and  
103 Methods) in cells expressing protected Gdh (*gdh-P*) or unprotected Gdh containing 10 sites  
104 (*gdh-U*) controlled by a  $P_{LAC}$  promoter. These experiments were conducted in a strain  
105 background that contained genetic modifications to inhibit gluconate metabolism and decouple  
106 glucose phosphorylation and transport to efficiently utilize glucose as a substrate for target  
107 metabolic pathways (KTS022IG, *mazF::Δ*, see Materials and Methods)<sup>15</sup>.

108

109 Cell growth was inhibited by MazF induction whereas the uninduced population continued to  
110 grow as a function of time (Figure 2b). Cells bearing *gdh-P* driven by a  $P_{LAC}$  promoter displayed  
111 up to a 3-fold higher gluconate concentration and 5-fold higher gluconate per unit time in the  
112 presence of MazF compared to cells that were not induced with aTc (Figure 2c and  
113 Supplementary Figure 6a). The gluconate titer was 85% higher for cells induced with MazF and  
114 Gdh-P compared to cells that were not induced with aTc following 18.25 hr (Figure 2d). A  
115 protected fluorescent reporter (*sfGFP-P*) N-terminally fused to Gdh-U or Gdh-P increased up to  
116 3.3 and 5-fold as a function of aTc (Supplementary Fig. 6b). These data demonstrated that the  
117 MazF resource allocator could enhance metabolic flux by protecting genes in a target metabolic  
118 pathway.

119

#### 120 *Enhancement of resource redistribution activity by protection of key host-genes that support* 121 *synthetic circuit operation*

122 Synthetic circuits depend on a dense network of host-genes including the transcriptional and  
123 translational machinery. Therefore, MazF-mediated decay of host factors could lead to  
124 degradation of circuit function. To investigate whether protection of support genes could  
125 improve the performance of the resource allocator, we tested whether protection of an  
126 orthogonal RNA polymerase T7 could enhance the circuit output. A protected (T7-P) or  
127 unprotected (T7-U, 50 sites) T7 controlled by an IPTG-inducible promoter ( $P_{LAC}$ ) was used to  
128 drive the expression of mCherry (Figure 3a). The combination of T7-P and mCherry-P yielded a  
129 21 or 7.6-fold higher expression level of mCherry compared T7-P, mCherry-U or T7-U,  
130 mCherry-P in the presence of MazF (5 ng/ml aTc) and 1 mM IPTG. T7-P regulating an N-  
131 terminal fluorescent protein fusion of mCherry-P to Gdh-P (mCherry-P-Gdh-P) exhibited a 1.4  
132 and 15-fold higher expression compared to T7-P, mCherry-P-Gdh-U or T7-U, mCherry-P-Gdh-P  
133 (Supplementary Figure 7). The mCherry expression level of the T7-X, mCherry-X (Figure 3a)  
134 and T7-X, mCherry-X-Gdh-X (Supplementary Figure 7) circuits were differentially enhanced by  
135 protection of T7 or the reporter gene (*mCherry-X* or *mCherry-X-gdh-X*) in the presence of MazF.

136 Thus, the enhancement of resource redistribution activity by protection of specific genes in a  
137 circuit depended on the circuit composition.

138

139 Identifying translation factors in need of protection is challenging since the basic translation  
140 machinery consists of 78 factors including ribosomal proteins and aminoacyl-tRNA synthases<sup>16</sup>.

141 To identify candidates, the proteome of MazF-induced cells was measured as a function of time.

142 The majority of the proteome (216 measured proteins) and 91% of 35 detectable ribosomal

143 proteins varied by less than 10% following 5 hours of induction, demonstrating that highly

144 abundant proteins were stable following exposure to MazF (Supplementary Figure 8a).

145 Ribosomal protein subunits S9, S20 and L17 decreased by ~20% and an essential elongation

146 factor EF-Ts decreased by approximately 80% following 5 hours of induction with MazF

147 (Supplementary Figure 8b). In the presence of MazF, a protected version of EF-Ts (EF-Ts-P)

148 driven by an IPTG-dependent promoter ( $P_{LAC}$ ) significantly enhanced the expression of

149 mCherry-P compared to cells that were not induced with EF-Ts-P (Figure 3b). These results

150 indicated that genome-wide measurements could be used to discover support genes in need of

151 protection to augment resource redistribution activity.

152

153 Global mRNA decay could generate imbalances in the expression levels of genes in a

154 regulatory network. For example, high concentrations of truncated mRNA fragments could

155 saturate exonucleases that process these fragments into mononucleotides<sup>17</sup>. Further, mRNA

156 cleavage generates ribosome stalling at the 3' end of the mRNA, referred to as non-stop

157 complexes, which require the action of ribosome recycling factors to rescue the ribosomes<sup>18</sup>.

158 RNase R is a multifunctional protein that exhibits ribonuclease and ribosome recycling factor

159 activities<sup>19</sup>. Co-expression of MazF and RNase R-P significantly enhanced the expression of

160 mCherry-P compared to cells expressing only MazF (Figure 3b). However, co-expression of EF-

161 Ts-P and RNase R-P did yield an additional enhancement in the level of mCherry-P in the

162 presence of MazF compared to cells expressing either of single support genes, RNase R or EF-

163 Ts-P (Supplementary Figure 9). These results suggested that epistasis among support genes

164 could potentially limit incremental improvement of resource redistribution activity.

165

166 *The mazF mRNA-decay feedback loop enhanced resource redistribution activity via proportional*

167 *control*

168 The *mazF* transcript is enriched for recognition sites (Supplementary Figure 1b), establishing an

169 mRNA-decay negative feedback loop. We suspected that protection of MazF could enhance

170 circuit performance. However, the feedback loop may modulate the regulatory dynamics of  
171 MazF and therefore influence resource redistribution activity. To investigate this possibility, we  
172 probed the role of the feedback in the MazF resource allocator.

173

174 Cells induced with *mazF-U* (9 sites) exhibited a lower steady-state mRNA level compared to  
175 cells expressing *mazF-P* (Supplementary Figure 10a), demonstrating that the feedback loop  
176 was actively regulating the abundance of the *mazF* transcript. Corroborating this result, a 35%  
177 lower threshold of aTc was required to inhibit growth in a strain expressing MazF-P compared to  
178 MazF-U (Supplementary Figure 10b), suggesting that protection of *mazF* mRNA enhanced the  
179 MazF protein level. The Hill coefficients of OD600 as a function of aTc following 11.2 hr of  
180 induction were 2.6 and 5.9 for cells induced with MazF-U or MazF-P, revealing an ultrasensitive  
181 relationship between MazF activity and cell growth.

182

183 Contrary to expectation, MazF-U displayed significantly higher mCherry-P expression compared  
184 to MazF-P across a broad range of aTc concentrations, showing that the negative feedback  
185 loop enhanced resource redistribution activity (Supplementary Figure 10c). To further  
186 investigate the quantitative relationship between feedback loop strength and resource  
187 redistribution activity, we varied the number of recognition sites in the *mazF* transcript (Figure  
188 3c, Supplementary Figure 11). The MazF induction ratio increased with the number of sites and  
189 the wild-type *mazF* sequence (9 sites) generated nearly the highest output level. In sum, these  
190 results indicated that the activity of the feedback loop was a tunable knob that could be used to  
191 modulate circuit performance.

192

193 A dynamic resource allocation model was constructed to provide insight into the role of the  
194 negative feedback loop on circuit behavior (Supplementary Text). The model represented the  
195 mRNA and protein levels of key species, which compete for limiting ribosome pools including  
196 ribosomes ( $r$ ), unprotected proteome ( $p$ ), MazF ( $mfp$ ) and a protected reporter gene ( $FP$ ). The  
197 growth rate ( $\lambda$ ) function was based on a previous coarse-grained mechanistic model of gene  
198 expression and growth<sup>20</sup>. The model equations are described in the Supplementary Text and  
199 Supplementary Table II and III provides a list of model species and parameters.

200

201 The relationship between steady-state total MazF concentration ( $mazF_T$ ) and the FP translation  
202 rate ( $k_{transFP} = k_{transFP}$ ) is non-monotonic (Supplementary Figure 12a), indicating that there is an  
203 optimal level of  $mazF_T$  to maximize the synthetic circuit output. The model shows that the



204 strength of the feedback loop, represented by the dissociation constant of MazF dimer (*mfpd*) to  
205 the *mazF* transcript *mf* ( $K_{df} = k_{rff}/k_f$ ), is inversely correlated with the dose-response  
206 ultrasensitivity of  $mazF_T$  as a function of the *mfp* transcription rate ( $\alpha_f$ , Figure 4a,b). Molecular  
207 mechanisms that realize ultrasensitivity include MazF dimerization<sup>21</sup>, molecular  
208 sequestration<sup>22,23</sup> of mRNAs by ribosomes<sup>24</sup>, or positive feedback<sup>25</sup>. In addition, thresholded  
209 control of  $\lambda$  by  $mazF_T$ , which was observed in our experimental and modeling data (Figure 4d  
210 and Supplementary Figure 10b), could contribute to ultrasensitivity in the network. For high  $K_{Df}$   
211 corresponding to the open loop system, the model exhibits bistability manifesting as two stable  
212 steady states across a range of  $\alpha_f$  values (Supplementary Figure 12b). These results show that  
213 the negative feedback loop enables proportional adjustment of the  $mazF_T$ <sup>26</sup> and reduces the  
214 potential for bistability by abolishing ultrasensitivity<sup>23,27</sup> (Figure 4b). As such,  $mazF_T$  could be  
215 tuned to operate in the regime that maximized resource redistribution activity.

216  
217 For a fixed value of  $\alpha_f$ ,  $k_{transFP}$  is inversely related to  $K_{Df}$  (Figure 5f), qualitatively recapitulating the  
218 increase in mCherry-P with the number of binding sites in the *mazF* transcript (Figure 3e).  $\lambda$  and  
219 the concentration of  $p$  decrease as a function of  $\alpha_f$ , mirroring experimental data that showed a  
220 decrease in saturating OD600 and mCherry-U as a function of aTc (Supplementary Figure 2,  
221 3a, 10b and Figure 4c,d). The increase in ultrasensitivity of the dose response of  $mazF_T$  vs.  $\lambda$   
222 with the strength of the feedback loop (Figure 4d) reflected the enhanced ultrasensitivity of the  
223 steady-state dose response of aTc vs. biomass (OD600) for cells expressing MazF-P compared  
224 to MazF-U (Supplementary Figure 10b). Reducing the negative feedback loop activity narrows  
225 the range of  $\alpha_f$  values that map to high total  $r$  concentration ( $r_T$ ). Above a threshold value of  $K_{Df}$   
226 ( $K_{Df} \geq 1.9 = \mu M$ ),  $r_T$  decreases monotonically with  $\alpha_f$  (Figure 4e). The negative feedback has  
227 important implications for resource allocator design by enabling precise tuning of the MazF  
228 operating point by establishing a proportional relationship between  $\alpha_f$  and  $mazF_T$ . Indeed, this  
229 negative feedback may provide an evolutionary advantage for cells by preventing the  
230 deleterious effects of MazF overexpression that accelerated cell death (Supplementary Figure  
231 13).

232  
233 *Time-series RNA-seq measurements provided insights into the physiological impact of MazF*  
234 *activity and identified design elements for building the MazF resource allocator*

235 To provide insights into the genome-wide variation in transcript abundance following MazF  
236 exposure, RNA-seq measurements were collected every 2 min for a total of 8 min. The majority  
237 of the 192 endogenous protected genes increased or remained constant following induction with

238 MazF for 8 min (Figure 5a). The abundance of each transcript is determined by a balance  
239 between the rates of synthesis and decay catalyzed by RNases and MazF. Therefore, it was  
240 challenging to decipher the direct effects of MazF on transcript abundance. Nevertheless, the  
241 number of MazF sites was negatively correlated with the mean log<sub>2</sub> fold change of transcript  
242 abundance following 8 min of induction with aTc, indicating that on average the number of MazF  
243 sites predicted the fold-change across the transcriptome (Figure 5b).

244

245 Partitioning the transcriptome fold-change dynamics into three clusters (see Materials and  
246 Methods) identified transcripts that were down-regulated (K1, n = 460), rapidly increased and  
247 delayed down-regulation (K2, n = 148) or increased in response to MazF induction (K3, n = 331,  
248 Figure 5c and Supplementary Figure 14). We evaluated functional or regulatory enrichments ( $p$   
249  $< 0.05$ ) in each cluster to provide insights into the physiological response to MazF exposure  
250 (Supplementary Table V). Cell envelope and genes regulated by Fur, MraZ and LexA were  
251 enriched in the K1 cluster (Figure 5c and Supplementary Figure 14b). MraZ is a transcriptional  
252 repressor that controls many genes involved in cell division and cell wall biosynthesis<sup>28</sup>. In  
253 addition, the cell division regulator *minE* mRNA decreased significantly in the RNA-seq data  
254 (Figure 5a), corroborating a link between MazF activity and inhibition of cell division<sup>29,30</sup>. The K2  
255 cluster was enriched for genes regulated by NikR, GlpR, GcvA, IHF, IscR and RstA and amino  
256 acid and anaerobic metabolism (Supplementary Figure 14). The numerous regulatory  
257 categories in K2 (Supplementary Table V) suggested that the pulsatile transcript dynamics  
258 could be established by an initial increase in synthesis due to changes in transcription factor  
259 activity and delayed down-regulation due to mRNA-decay at a threshold concentration of MazF.  
260 Genes regulated by ArgR were enriched in the up-regulated cluster K3. In addition, 11 TCA  
261 cycle enzymes were up-regulated in the RNA-seq data ( $p = 0.051$  enrichment in K3), suggesting  
262 that MazF-induced cells exhibited high metabolic activity (Supplementary Figure 15 and  
263 Supplementary Table V). Previous work has demonstrated that fumarate production increased  
264 the frequency of persister cells following antibiotic exposure<sup>31</sup>. A closer examination of the  
265 catabolic pathway revealed that fumarate producing enzymes were significantly induced,  
266 suggesting that MazF activity could be connected to persistence via enhancement of fumarate  
267 flux<sup>32,33</sup> (Supplementary Figure 15).

268

269 Cold-shock genes are selectively expressed in response to cold stress and perform diverse  
270 functions including unwinding of RNA secondary structures, modulation of ribosome and  
271 DNA/RNA chaperone activity<sup>34</sup>. The RNA-seq data demonstrated significant shifts in cold-shock

272 *cspBCEFG* and associated *rbfA*, *rhIB*, *rhIE* and *deaD* transcript abundance as a function of time  
273 (Supplementary Figure 16). IF-3, one of the major translation factors in *E. coli*, has been shown  
274 to mediate cold shock translational bias in response to cold stress<sup>35,36</sup>. IF-3 increased over 4-  
275 fold in the proteomics data (Supplementary Figure 8b) following 5 hr of MazF induction,  
276 whereas the abundance of *infC* mRNA did not change significantly in the RNA-seq data (Figure  
277 5a and Supplementary Figure 16). Future work should investigate the molecular mechanisms  
278 that underlie the connection among MazF activity, up-regulation of IF-3, and rapid changes in  
279 cold-shock mRNA abundance.

280

281 Since cold-shock transcripts were up-regulated in response to MazF activity, these sequences  
282 were promising candidates for engineering MazF-responsive promoters. To test the modularity  
283 of cold-shock induction by MazF, we constructed a tandem promoter composed of P<sub>LAC</sub>  
284 upstream of the *cspB* or *cspG* promoter, UTR and the first 14 amino acids of CspG or CspB N-  
285 terminally fused to sfGFP-P (Supplementary Figure 17). MazF induction increased sfGFP-P by  
286 a maximum of 20 or 80-fold, demonstrating that the *cspB* and *cspG* regulatory sequences are  
287 modular control elements that directly respond to MazF activity as an input.

288

289 *Relationship between MazF cleavage efficiency and predicted mCherry mRNA secondary*  
290 *structure*

291 A quantitative understanding of the mapping between MazF site placement and cleavage  
292 efficiency could enable tuning of the timing and degrees of protection to inform resource  
293 allocator design. To explore the dominant parameters that influence MazF cleavage efficiency,  
294 we varied the number and position of MazF recognition sites in the *mCherry* transcript. Previous  
295 work demonstrated that MazF activity was inhibited by strong secondary structures and  
296 ribosomes enhanced cleavage efficiency by unwinding mRNA secondary structures during  
297 translation<sup>37</sup>.

298

299 To map the relationship between position and cleavage efficiency, a single MazF site was  
300 inserted at 14 positions in *mCherry-P* (Supplementary Figure 18). These *mCherry* sequences  
301 exhibited a broad range of expression levels in response to MazF (Supplementary Figure 19a).  
302 The output was correlated with the predicted secondary structure Gibbs free energy ( $\Delta G$ ) 40-47  
303 bp upstream of the recognition site ( $\rho$  ranged between -0.7 to -0.6,  $p < 0.01$ ) computed using  
304 NUPACK (Supplementary Figure 18b,c). For sequences spanning upstream and downstream of  
305 the MazF site, mCherry expression was correlated ( $\rho = -0.6$ ,  $p < 0.05$ ) with  $\Delta G$  (38-41 bp,

306 Supplementary Fig. 18d). However, the  $\Delta G$  of the sequence downstream of the recognition site  
307 was not correlated with the expression level of *mCherry* across a broad range of window sizes  
308 (Supplementary Fig. 18e). Therefore, MazF cleavage efficiency could be predicted using the  
309 folding energy of the local mRNA secondary structure upstream or across the recognition site.

310

311 To provide insight into the programmability of MazF cleavage efficiency, we interrogated  
312 whether measurements of *mCherry* variants containing a single MazF site (Supplementary  
313 Figure 18a) could predict the expression of *mCherry* sequences containing combinations of  
314 sites. *mCherry* expression decreased as a function of the number of recognition sites in the  
315 presence of MazF (Supplementary Fig. 18f). The product of the single site *mCherry* expression  
316 levels could predict the expression of the multi-site variants ( $p < 0.0001$ ), suggesting that  
317 combinations of MazF recognition sites could be used to modulate the degree of transcript  
318 protection.

319

## 320 **DISCUSSION**

321 A major goal of synthetic biology and metabolic engineering is to develop strategies to control  
322 the resource economy of cells for switching between modes of growth and production<sup>38</sup>. During  
323 a production phase, cellular energy and resources are focused on specific pathways, while  
324 minimizing resource expenditure towards nonessential cellular operations. Towards these  
325 objectives, previous work leveraged tunable enzymatic degradation of a metabolic hub that  
326 determines the direction of metabolic flux to augment the yield and titer of a metabolic pathway  
327 two-fold<sup>39</sup>. While this strategy provided localized control of metabolic flux, it does not modulate  
328 the global allocation of subsystems such as transcription and translation. On a larger scale,  
329 inducible regulation of RNA polymerase subunits was recently used to control *E. coli* growth<sup>36</sup>.  
330 However, this mechanism cannot be generally applied to redirect resources towards engineered  
331 networks. Here, we achieved programmable and genome-wide manipulation of intracellular  
332 resources to enhance a target function by exploiting global mRNA decay. This approach could  
333 be harnessed for diverse applications by systematically discovering genes in need of protection  
334 to enhance a target function. Indeed, recent advancements in DNA synthesis technologies will  
335 facilitate large-scale recoding of support genes to protect from MazF activity.

336

337 MazF regulates orders of magnitude more genes simultaneously compared to other  
338 technologies such as CRISPRi. Therefore, this approach could be used to reprogram cellular  
339 behavior in response to changing environments<sup>41,42</sup>. Homologues of MazF that recognize 3, 5

340 and 7-bp recognition sites have been identified in diverse bacterial species<sup>43-45</sup>. Active site  
341 mutations have been shown to modify the MazF sequence specificity, suggesting that protein  
342 engineering could be used to expand the diversity of MazF recognition site sequences<sup>46</sup>. The  
343 variation in recognition sequence specificity could be used to tune the number of genes targeted  
344 by MazF.

345

346 In the model, the MazF transcription rate  $\alpha_f$  is a bifurcation parameter that triggers bistability in  
347 the absence of negative feedback (Supplementary Figure 19b). Bistability can be established in  
348 circuit with ultrasensitivity and positive feedback<sup>23</sup>. Positive feedback can originate from several  
349 mechanisms, which increases the MazF translational rate. For  $\alpha_f = 0$ , increasing the  
350 transcription rate of  $p$  ( $\alpha_p$ ) reduces  $r_T$ , which reveals that  $mp$  and  $mr$  compete for limiting  
351 ribosome pools (Supplementary Figure 19c). Since MazF has a 2-fold higher binding affinity for  
352  $mp$  compared to  $mr$ , reducing  $mp$  levels yields an increase in the translation rate of  $r$  and hence  
353 the translation rate of MazF, forming a net positive feedback loop. The strength of the positive  
354 feedback loop could also be modulated by changes in protein concentrations due to growth rate  
355 inhibition. The *mazF* mRNA-decay negative feedback realizes a proportional relationship  
356 between  $\alpha_f$  and the total concentration of MazF at steady-state, thus reducing the potential for  
357 bistability in the network<sup>23,26,27</sup>. Future work should explore how negative feedback established  
358 by mRNA-decay modulates the sensitivity of a circuit to parameter variations and response time  
359 compared to transcriptional autoregulation<sup>47,48</sup>.

360

361 There are several challenges and limitations to optimizing the MazF resource allocator. MazF  
362 activity increased the abundance of a set of host-cell transcripts, which sequesters resources  
363 away from engineered circuits. However, this activation program could be exploited by  
364 repurposing regulatory elements that respond to MazF activity to expand the resource allocator  
365 design. In addition, MazF activity has been shown to yield a heterogeneous ribosome pool by  
366 targeting a specific site of the 16S rRNA<sup>49</sup>, which could manifest as translation bias for selected  
367 transcripts<sup>50</sup>. Decay of the unprotected proteome occurs on the timescale of hours, thus limiting  
368 the time scale required to shift metabolic flux. To rapidly manipulate metabolic flux, induction of  
369 MazF could be coupled with proteases<sup>7</sup> for targeted control of protein abundance. As the  
370 proteome decays, stoichiometric relationships required for protein activity must be maintained<sup>51</sup>.  
371 Further, MazF has been shown to establish a futile cycle of continuous RNA synthesis and  
372 decay, resulting in energy dissipation<sup>32</sup>. To minimize an energy deficit, orthogonal T7-P could be

373 used to drive the engineered pathway while inhibiting native RNA polymerases. Future efforts  
374 should pinpoint the dominant parameters that influence resource redistribution activity.

375

376 Top-down approaches such as MazF could be used to discover host factors that preserve high  
377 metabolic activity in the absence of growth. Genome engineering could be used to protect these  
378 pathways from MazF activity<sup>52</sup>. Optimal regulatory strategies should be designed to balance  
379 enhancement of resource redistribution activity and degradation of cellular support subsystems  
380 over long time scales. For example, MazF could be transiently induced until energy degrades to  
381 a threshold that triggers inhibition of MazF activity and allows rebalancing of the proteome<sup>53</sup>.  
382 Together, advances in regulatory control strategies and large-scale recoding could enable the  
383 design of protected and unprotected orthogonal sub-genomes that dynamically switch between  
384 cellular operations.

385

386

## 387 **MATERIALS AND METHODS**

388

### 389 Cloning and strain construction

390 *mazF* was deleted from the *E. coli* BW25113 strain using lambda-red recombination and verified  
391 by colony PCR. MazF was introduced into an intergenic region referred to as SafeSite 1  
392 (chromosomal position 34715) under control of an aTc-inducible promoter ( $P_{TET}$ ). PCR  
393 amplifications were performed using Phusion High-Fidelity DNA Polymerase (NEB) and  
394 oligonucleotides for cloning and strain construction were obtained from Integrated DNA  
395 Technologies. Standard cloning methods were used to construct plasmids. Plasmids were  
396 based on a previously generated construct library<sup>54</sup>. A list of plasmids and strains used in this  
397 study can be found in Supplementary Table I.

398

### 399 Growth conditions and plate reader experiments

400 For plate reader experiments, cells were grown at 37°C for approximately 6-8 hours and then  
401 diluted to OD600 of 0.01 in a 96-well plate (Corning) in LB Lennox media (Sigma). For plate  
402 reader experiments, cells were grown in 200  $\mu$ l volumes at 37°C in 96-well plate covered by a  
403 gas-permeable seal (Fisher Scientific) in an M1000 (Tecan) or Synergy 2 (BioTek) plate reader.  
404 The method measured cell density (OD600) and fluorescence every 10 min for 15 hr. The  
405 M1000 excitation and emission wavelengths were 485, 510 nm for GFP and 587, 610 nm for  
406 RFP (5 nm bandwidth). The BioTek excitation and emission wavelengths were 485, 528 nm for  
407 GFP and 560, 620 for RFP (20 nm bandwidth). The M1000 and Synergy 2 measured  
408 absorbance at 600 nm (OD600) to quantify total biomass.

409

410 qPCR measurements

411 Oligonucleotides for quantitative real-time PCR (sequences are listed in Supplementary Table  
412 IV) were designed using Integrated DNA Technologies. 500 ng of total RNA was reverse  
413 transcribed using the iScript cDNA synthesis kit (Bio-Rad). The reaction mix contained 5  $\mu$ l of  
414 SsoAdvanced Universal Probes Supermix (Bio-Rad), 0.5  $\mu$ l primer and probe corresponding to  
415 250 nM primers and 125 nM probe (20X stock) and 0.5  $\mu$ l of cDNA. qPCR measurements were  
416 performed using a CFX96 real-time PCR machine (Bio-Rad). The relative expression levels  
417 were determined by a  $2^{-\Delta\Delta C_T}$  method. Each sample was normalized by the cycle threshold  
418 geometric mean using reference genes *rrsA* and *cysG*<sup>55</sup>.

419

420 Gluconate measurements

421 KTS022IG *mazF::Δ* (strain S1 in Supplementary Table I) strains bearing pBbA6c-gdh-X  
422 (plasmid P8-9 in Supplementary Table I) and pBbS2k-mazF-U (plasmid P1) were grown in LB  
423 medium at 37°C overnight and used to inoculate a 10 mL culture the next morning at an OD600  
424 of 0.05. At OD600 of 0.3, 1.5% glucose, 1000  $\mu$ M IPTG and 5 or 0 ng/ml were administered to  
425 the cultures. 1 mL samples were collected at the specified times and centrifuged at 5000 x g for  
426 5 min to isolate the supernatant. The supernatant samples were analyzed for gluconic acid  
427 using a 1200 Series liquid chromatography system (Agilent Technologies, Santa Clara, CA)  
428 coupled to an LTQ-XL ion trap mass spectrometer (Thermo Scientific, San Jose, CA) equipped  
429 with an electrospray ionization source. Aliquots of the diluted samples were injected onto a  
430 Rezex ROA-Organic Acid H+ (8%) (150 mm x 4.6 mm) column (Phenomenex, Torrance, CA)  
431 equipped with a Carbo-H+ (4 mm x 3 mm) guard column (Phenomenex). Gluconic acid was  
432 eluted at 55 °C at approximately 3.5 min with an isocratic flow rate of 0.3 mL/min of 0.5% (v/v)  
433 formic acid in water. Precursor ion *m/z* 195.1 was selected in negative ion mode using an  
434 isolation window of *m/z* 2 and was fragmented with a normalized collision energy of 35.  
435 Fragment ions were analyzed in the range of *m/z* 50-200. *m/z* 128.5-129.5 was selected as  
436 pseudo-MRM transition for compound quantification. Resulting peak areas were compared to an  
437 external standard calibration in the range of 0.2-200  $\mu$ M. The source parameters were ion spray  
438 voltage: 4 kV; capillary temperature: 350 °C; capillary voltage: - 2 V; tube lense voltage: -40 V;  
439 sheath gas flow: 60; auxiliary gas flow: 5; and sweep gas flow: 10 (all arbitrary units).

440

441 Proteomics

442 BW25113 *mazF::Δ*, SafeSite1::*tetR-P<sub>TET</sub>-mazF* (strain S2 in Supplementary Table I) was grown  
443 overnight in LB at 37°C and then diluted to an OD600 of 0.05 in a 500 ml LB culture. At OD600

444 of 0.5, cell populations were induced with 5 ng/mL aTc and 40 mL of cells were collected  
445 approximately every hour and centrifuged for 5 min at 4300 x g. Proteomic samples were  
446 prepared for analysis as previously described<sup>56</sup>. Briefly, the cell pellets were lysed and proteins  
447 were extracted by chloroform/methanol precipitation. The proteins were resuspended in 100 mM  
448 AMBIC with 20% methanol and reduced with tris(2-carboxyethyl)phosphine (TCEP) for 30 min,  
449 followed by addition of iodoacetamide (IAA; final conc. 10 mM) for 30 min in the dark, and then  
450 digested overnight with MS-grade trypsin (1:50 w/w trypsin: protein) at 37°C. Peptides were  
451 stored at -20°C until analysis.

452

453 Samples were analyzed on an Agilent 1290 UHPLC - 6550 QTOF liquid chromatography mass  
454 spectrometer (LC-MS/MS; Agilent Technologies) system and the operating parameters for the  
455 LC-MS/MS system were described previously<sup>56</sup>. Peptides were separated on a Sigma-Aldrich  
456 Ascentis Express Peptide ES-C18 column (2.1 mm x 100 mm, 2.7 mm particle size, operated at  
457 60°C) and a flow rate of 0.4 mL/min. The chromatography gradient conditions were as follows:  
458 from the initial starting condition (98% buffer A containing 100% water, 0.1% formic acid and 2%  
459 buffer B composed of 100% acetonitrile, 0.1% formic acid) the buffer B composition was held for  
460 2 min then increased to 10% over 3 min; then buffer B was increased to 40% over 117 min, then  
461 increased to 90% B over 3 min and held for 8 min, followed by a ramp back down to 2% B over  
462 1 min where it was held for 6 min to re-equilibrate the column to the original conditions. The  
463 data was analyzed with the Mascot search engine version 2.3.02 (Matrix Science) and filtered  
464 and validated by using Scaffold v4.3.0 (Proteome Software Inc.) as described previously<sup>56</sup>.

465

#### 466 RNA-seq library construction and sequencing

467 BW25113 mazF::Δ, SafeSite1::tetR-P<sub>TET</sub>-mazF (strain S2 in Supplementary Table I) was grown  
468 overnight in LB at 37°C and then diluted to an OD<sub>600</sub> of 0.05 in a 10 mL LB culture. At an  
469 OD<sub>600</sub> of 0.5, cells were induced with 5 ng/mL aTc. Samples were collected as follows: 200 μl  
470 of the cell cultures were added to 400 μl of RNAprotect (Qiagen) to stabilize the RNA, incubated  
471 for 5 min at room temperature and then spun down for 10 min at 5000 x g. Total RNA was  
472 isolated using RNeasy purification kit and treated with DNAase I (Qiagen). The Functional  
473 Genomics Lab (FGL), a QB3-Berkeley Core Research Facility at UC Berkeley, constructed the  
474 sequencing libraries. At the FGL, Ribo-Zero rRNA Removal Kits (Illumina) were used to remove  
475 ribosomal RNA and ERCC RNA Spike-In Control Mixes (Ambion by Life Technologies) were  
476 added to the samples. The library preparation was performed on an Apollo 324™ with PrepX™  
477 RNAseq Library Prep Kits (WaferGen Biosystems, Fremont, CA), and 18 cycles of PCR  
478 amplification was used for index addition and library fragment enrichment.



479

#### 480 RNA-seq data analysis

481 The read counts were mapped onto the MG1655 genome using Bowtie 1<sup>57</sup> on the galaxy  
482 webserver<sup>58</sup>. Reads per kilobase of transcript per million (RPKM) was computed by multiplying  
483 the number of mapped reads by  $10^9$  and then dividing by the gene length and median number  
484 of total reads for each condition. For clustering analysis, the correlation coefficient ( $\rho = 0.9$ )  
485 between two biological replicates as a function of time was used as a threshold to remove  
486 genes that exhibited variability between replicates. The log<sub>2</sub> fold change was partitioned into  
487 clusters using the K-means algorithm (MATLAB). To determine an optimal number of clusters,  
488 the sum of squared errors (SSE) was computed for each data point from the corresponding  
489 cluster centroid across a range of K-values (1-10). The Elbow method was used as a heuristic  
490 to select the optimal number of partitions that minimizes the SSE. The Fisher's exact test ( $p <$   
491  $0.05$ ) was used to evaluate enrichment of genes based on TIGRFAM annotation  
492 (MicrobesOnline) or transcription factor network (RegulonDB). Supplementary Table V contains  
493 a list of genes in the enriched categories.

494

#### 495 Computational modeling

496 We used custom code for computational modeling and data analysis in MATLAB (Mathworks)  
497 and Python. Details about the model construction are provided in the Supplementary Text.  
498 Model species and parameters are listed in Supplementary Tables II and III.

499

#### 500 Characterization of cell viability

501 BW25113 *mazF::Δ* strains transformed with pBbS2k-*mazF*-U or pBbS2k-*mazF*-P were grown  
502 overnight at 37°C in LB media and then diluted to an OD<sub>600</sub> of 0.01 in 5 ml LB media. At an  
503 OD<sub>600</sub> of 0.3, 5 ng/mL aTc dissolved in 100% ethanol was used to induce *mazF* and an  
504 equivalent volume of 100% ethanol was administered to the uninduced cell populations.  
505 Following 0 and 7 hr, cells were prepared for fluorescent microscopy using the LIVE/DEAD  
506 BacLight™ Bacteria Viability Kit (Thermo Fisher) to characterize the fraction of viable cells  
507 across the population as a function of time. Microscope images were collected using a Zeiss  
508 Axio Observer D1 and Plan-Apochromat 63/1.4 Oil Ph3 M27 objective. Cells were imaged using  
509 excitation BP 470/40 and emission BP 525/50 (Filter Set 38 High Efficiency) or excitation 560/40  
510 and emission BP 630/75 (Filter Set 45). Images were captured with a Hamamatsu ORCA-  
511 Flash4.0 using the ZEN Software (Zeiss). Cell Counter (Fiji)<sup>59</sup> was used to analyze the images  
512 and quantify the number of viable and dead cells.

513

## 514 **ACKNOWLEDGEMENTS**

515 We would like to thank Karen Lundy for constructing the RNA-seq libraries and Kristala Prather  
516 (MIT) for providing *E. coli* strain S1 (see Supplementary Table I) for the gluconate  
517 measurements. This work was supported by the US Department of Energy (Grant DE-  
518 SC0008812) and used the Vincent J. Coates Genomics Sequencing Laboratory at UC Berkeley,  
519 supported by NIH S10 Instrumentation Grants S10RR029668 and S10RR027303. O.S.V. was  
520 supported by the Simons Foundation at the Life Sciences Research Foundation postdoctoral  
521 fellowship.

522

## 523 **CONTRIBUTIONS**

524 O.S.V. and A.P.A. designed the research. O.S.V. and M.T. carried out the experiments. O.S.V.  
525 performed the computational modeling. O.S.V., M.T. and A.P.A. discussed data analyses and  
526 O.S.V. and M.T. performed the analyses. O.S.V. wrote the manuscript and O.S.V., M.T. and  
527 A.P.A. contributed to revising manuscript. S.B. performed gluconate measurements and  
528 L.J.G.C. and C.J.P. implemented shotgun proteomics.

529

## 530 **COMPETING FINANCIAL INTERESTS**

531 The authors declare no competing financial interests.

532

## 533 **CORRESPONDING AUTHORS**

534 Correspondence to: [aparkin@lbl.gov](mailto:aparkin@lbl.gov), [venturelli@wisc.edu](mailto:venturelli@wisc.edu)

535

## 536 **REFERENCES**

- 537 1. Venturelli, O. S., Egbert, R. G. & Arkin, A. P. Towards engineering biological systems in a  
538 broader context. *J. Mol. Biol.* (2015). doi:10.1016/j.jmb.2015.10.025
- 539 2. Gyorgy, A. *et al.* Isocost lines describe the cellular economy of genetic circuits. *Biophys.*  
540 *J.* **109**, 639–646 (2015).
- 541 3. Cardinale, S. & Arkin, A. P. Contextualizing context for synthetic biology - identifying  
542 causes of failure of synthetic biological systems. *Biotechnol. J.* **7**, 856–866 (2012).
- 543 4. Dong, H., Nilsson, L. & Kurland, C. G. Gratuitous Overexpression of Genes in  
544 *Escherichia coli* Leads to Growth Inhibition and Ribosome Destruction. *J. Bacteriol.* **177**,  
545 1497–1504 (1995).
- 546 5. Shachrai, I., Zaslaver, A., Alon, U. & Dekel, E. Cost of Unneeded Proteins in *E. coli* Is  
547 Reduced after Several Generations in Exponential Growth. *Mol. Cell* **38**, 758–767 (2010).
- 548 6. Mutalik, V. K. *et al.* Precise and reliable gene expression via standard transcription and  
549 translation initiation elements. *Nat. Methods* **10**, 354–60 (2013).

- 550 7. Cameron, D. E. & Collins, J. J. Tunable protein degradation in bacteria. *Nat. Biotechnol.*  
551 **32**, 1–8 (2014).
- 552 8. Qi, L. S. *et al.* Repurposing CRISPR as an RNA-guided platform for sequence-specific  
553 control of gene expression. *Cell* **152**, 1173–83 (2013).
- 554 9. Zalatan, J. G. *et al.* Engineering complex synthetic transcriptional programs with CRISPR  
555 RNA scaffolds. *Cell* **160**, 339–350 (2014).
- 556 10. Gertz, J. & Cohen, B. A. Environment-specific combinatorial cis-regulation in synthetic  
557 promoters. *Mol. Syst. Biol.* **5**, 244 (2009).
- 558 11. Bremer, H. & Dennis, P. *Modulation of chemical composition and other parameters of the*  
559 *cell by growth rate. In Escherichia coli and Salmonella typhimurium.* (ASM Press, 1996).
- 560 12. Narayanan, K. & Makino, S. Interplay between viruses and host mRNA degradation.  
561 *Biochim. Biophys. Acta - Gene Regul. Mech.* **1829**, 732–741 (2013).
- 562 13. Uzan, M. & Miller, E. S. Post-transcriptional control by bacteriophage T4: mRNA decay  
563 and inhibition of translation initiation. *Viol. J.* **7**, 360 (2010).
- 564 14. Zhang, Y., Zhang, J., Hara, H., Kato, I. & Inouye, M. Insights into the mRNA cleavage  
565 mechanism by MazF, an mRNA interferase. *J Biol Chem* **280**, 3143–3150 (2005).
- 566 15. Solomon, K. V., Moon, T. S., Ma, B., Sanders, T. M. & Prather, K. L. J. Tuning primary  
567 metabolism for heterologous pathway productivity. *ACS Synth. Biol.* **2**, 126–135 (2013).
- 568 16. Gil, R., Silva, F. J. & Pereto, J. Determination of the Core of a Minimal Bacterial Gene  
569 Set. *Microbiol. Mol. Biol. Rev.* **68**, 518–537 (2004).
- 570 17. Deutscher, M. P. Degradation of RNA in bacteria : comparison of mRNA and stable RNA.  
571 *Nucleic Acids Res.* **34**, 659–666 (2006).
- 572 18. Keiler, K. C. Mechanisms of ribosome rescue in bacteria. *Nat. Rev. Microbiol.* (2015).  
573 doi:10.1038/nrmicro3438
- 574 19. Richards, J., Mehta, P. & Karzai, A. W. RNase R degrades non-stop mRNAs selectively  
575 in an SmpB-tmRNA-dependent manner. *Mol. Microbiol.* **62**, 1700–1712 (2006).
- 576 20. Weiße, A. Y., Oyarzún, D. a., Danos, V. & Swain, P. S. Mechanistic links between cellular  
577 trade-offs, gene expression, and growth. *Proc. Natl. Acad. Sci.* 201416533 (2015).  
578 doi:10.1073/pnas.1416533112
- 579 21. Li, G. *et al.* Characterization of Dual Substrate Binding Sites in the Homodimeric  
580 Structure of Escherichia coli mRNA Interferase MazF. *J. Mol. Biol.* **357**, 139–150 (2006).
- 581 22. Buchler, N. E. & Louis, M. Molecular titration and ultrasensitivity in regulatory networks. *J.*  
582 *Mol. Biol.* **384**, 1106–1119 (2008).
- 583 23. Venturelli, O. S., El-Samad, H. & Murray, R. M. Synergistic dual positive feedback loops  
584 established by molecular sequestration generate robust bimodal response. *Proc. Natl.*  
585 *Acad. Sci.* **109**, (2012).
- 586 24. de Vos, D., Bruggeman, F. J., Westerhoff, H. V. & Bakker, B. M. How molecular  
587 competition influences fluxes in gene expression networks. *PLoS One* **6**, (2011).
- 588 25. Hoon Ha, S. & Ferrell Jr., J. E. Ultrasensitivity part III: cascades, bistable switches, and  
589 oscillators. *Trends Biochem. Sci.* **100**, 130–134 (2012).

- 590 26. Nevozhay, D., Adams, R. M., Murphy, K. F., Josic, K. & Balázsi, G. Negative  
591 autoregulation linearizes the dose-response and suppresses the heterogeneity of gene  
592 expression. *Proc. Natl. Acad. Sci. U. S. A.* **106**, 5123–8 (2009).
- 593 27. Tiwari, A. & Igoshin, O. A. Coupling between feedback loops in autoregulatory networks  
594 affects bistability range , open-loop gain and. *Phys. Biol.* **55003**, (2012).
- 595 28. Mengin-Lecreulx, D. *et al.* Contribution of the P(mra) promoter to expression of genes in  
596 the Escherichia coli mra cluster of cell envelope biosynthesis and cell division genes. *J.*  
597 *Bacteriol.* **180**, 4406–4412 (1998).
- 598 29. Hale, C. A., Meinhardt, H. & Boer, P. A. J. De. Dynamic localization cycle of the cell  
599 division regulator MinE in Escherichia coli. *EMBO J.* **20**, 1563–1572 (2001).
- 600 30. Eraso, J. M., Markillie, L. M., Mitchell, H. D., Taylor, R. C. & Orr, G. The Highly  
601 Conserved MraZ Protein Is a Transcriptional Regulator in Escherichia coli. *J. Bacteriol.*  
602 **196**, 2053–2066 (2014).
- 603 31. Kim, J. *et al.* Fumarate-Mediated Persistence of Escherichia coli against Antibiotics.  
604 *Antimicrob. Agents Chemother.* **60**, 2232–2240 (2016).
- 605 32. Mok, W. W. K., Park, J. O., Rabinowitz, J. D. & Brynildsen, M. P. RNA Futile Cycling in  
606 Model Persister Derived from MazF Accumulation. *MBio* **6**, e01588-15- (2015).
- 607 33. Tripathi, A., Dewan, P. C., Siddique, S. A. & Varadarajan, R. MazF-induced Growth  
608 Inhibition and Persister Generation in Escherichia coli. *J. Biol. Chemistry* **289**, 4191–4205  
609 (2014).
- 610 34. Gualerzi, C. O., Giuliodori, A. M. & Pon, C. L. Transcriptional and Post-transcriptional  
611 Control of Cold-shock Genes. *J. Mol. Biol.* **2836**, 527–539 (2003).
- 612 35. Giuliodori, A. M., Brandi, A., Giangrossi, M., Gualerzi, C. O. & Pon, C. L. Cold-stress-  
613 induced de novo expression of infC and role of IF3 in cold-shock translational bias. *RNA*  
614 **13**, 1355–1365 (2007).
- 615 36. Gualerzi, C. O. *et al.* *Ribosomes: structure, function, dynamics.* (Springer Science &  
616 Business Media, 2011).
- 617 37. Christensen-dalsgaard, M. & Gerdes, K. Translation affects YoeB and MazF messenger  
618 RNA interferase activities by different mechanisms. *Nucleic Acids Res.* **36**, 6472–6481  
619 (2008).
- 620 38. Venayak, N., Anesiadis, N., Cluett, W. R. & Mahadevan, R. Engineering metabolism  
621 through dynamic control. *Curr. Opin. Biotechnol.* **34**, 142–152 (2015).
- 622 39. Brockman, I. M. & Prather, K. L. J. Dynamic knockdown of E. coli central metabolism for  
623 redirecting fluxes of primary metabolites. *Metab. Eng.* **28**, 104–113 (2015).
- 624 40. Izard, J. *et al.* A synthetic growth switch based on controlled expression of RNA  
625 polymerase. *Mol. Syst. Biol.* **11**, 840 (2015).
- 626 41. Peters, J. M. *et al.* Resource A Comprehensive , CRISPR-based Functional Analysis of  
627 Essential Genes in Bacteria Resource A Comprehensive , CRISPR-based Functional  
628 Analysis of Essential Genes in Bacteria. *Cell* **165**, 1493–1506 (2016).
- 629 42. Yao, L., Cengic, I. & Hudson, E. P. Multiple Gene Repression in Cyanobacteria Using  
630 CRISPRi. *ACS Synth. Biol.* **5**, 207–12 (2016).

- 631 43. Yamaguchi, Y. & Park, J. Toxin-Antitoxin Systems in Bacteria and Archaea. *Annu. Rev.*  
632 *Genet.* **45**, 61–79 (2011).
- 633 44. Park, J.-H., Yamaguchi, Y. & Inouye, M. *Bacillus subtilis* mazF-bs (endoA) is a UACAU-  
634 specific mRNA interferase. *FEBS Lett.* **585**, 2526–2532 (2012).
- 635 45. Yamaguchi, Y., Nariya, H., Park, J. & Inouye, M. Inhibition of specific gene expressions  
636 by protein-mediated mRNA interference. *Nat. Commun.* **3**, 606–607 (2012).
- 637 46. Ishida, Y., Park, J., Mao, L., Yamaguchi, Y. & Inouye, M. Replacement of All Arginine  
638 Residues with Canavanine in MazF-bs mRNA Interferase Changes Its Specificity. *J. Biol.*  
639 *Chemistry* **288**, 7564–7571 (2013).
- 640 47. Rosenfeld, N., Elowitz, M. B. & Alon, U. Negative Autoregulation Speeds the Response  
641 Times of Transcription Networks. *J. Mol. Biol.* **2836**, 785–793 (2002).
- 642 48. Becskei, A. & Serrano, L. Engineering stability in gene networks by autoregulation.  
643 *Nature* **405**, 590–593 (2000).
- 644 49. Vesper, O. *et al.* Selective Translation of Leaderless mRNAs by Specialized Ribosomes  
645 Generated by MazF in *Escherichia coli*. *Cell* **147**, 147–157 (2011).
- 646 50. Sauert, M. *et al.* The MazF-regulon: a toolbox for the post-transcriptional stress response  
647 in *Escherichia coli*. *Nucleic Acids Res.* gkw115- (2016). doi:10.1093/nar/gkw115
- 648 51. Amitai, S., Yassin, Y. & Engelberg-kulka, H. MazF-Mediated Cell Death in *Escherichia*  
649 *coli*: a Point of No Return. *J. Bacteriol.* **186**, 8295–8300 (2004).
- 650 52. Bassalo, M. C. *et al.* Rapid and Efficient One-Step Metabolic Pathway Integration in *E.*  
651 *coli*. *ACS Synth. Biol.* **5**, 561–568 (2016).
- 652 53. Genetics, M. & Linda, L. The Aer protein and the serine chemoreceptor Tsr independently  
653 sense intracellular energy levels and transduce oxygen, redox, and energy signals for  
654 *Escherichia coli* behavior. *Proc. Natl. Acad. Sci.* **94**, 10541–10546 (1997).
- 655 54. Lee, T. *et al.* BglBrick vectors and datasheets: A synthetic biology platform for gene  
656 expression. *J. Biol. Eng.* **5**, 12 (2011).
- 657 55. Zhou, K. *et al.* Novel reference genes for quantifying transcriptional responses of  
658 *Escherichia coli* to protein overexpression by quantitative PCR. *BMC Mol. Biol.* **12**,  
659 (2011).
- 660 56. Fernández-niño, S. M. G. *et al.* Standard flow liquid chromatography for shotgun  
661 proteomics in bioenergy research. *Front. Bioeng. Biotechnol.* **3**, 1–7 (2015).
- 662 57. Langmead, B., Trapnell, C., Pop, M. & Salzberg, S. L. Ultrafast and memory-efficient  
663 alignment of short DNA sequences to the human genome. *Genome Biol.* **10**, (2009).
- 664 58. Afgan, E. *et al.* The Galaxy platform for accessible, reproducible and collaborative  
665 biomedical analyses: 2016 update. *Nucleic Acids Res.* **44**, gkw343 (2016).
- 666 59. Schindelin, J. *et al.* Fiji: an open-source platform for biological-image analysis. *Nat.*  
667 *Methods* **9**, (2012).
- 668

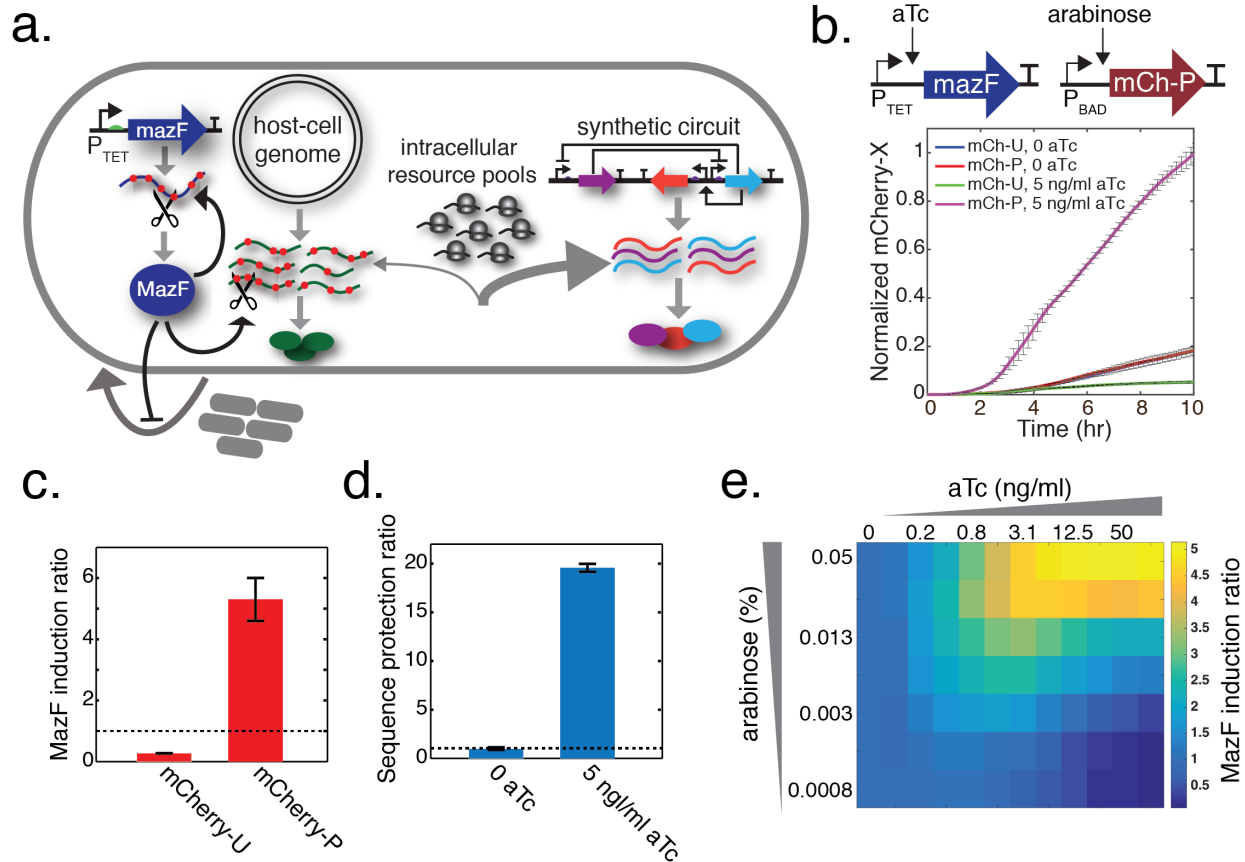

**Figure 1.** Programming mRNA decay to redistribute resources in *E. coli* to modulate the behavior of synthetic circuits. **(a)** Schematic diagram of the MazF resource allocator. Host-cell transcripts containing MazF recognition sites ('ACA') are targeted for cleavage. The MazF site can be removed from target genes while preserving the amino acid sequence. As such, MazF down-regulates transcripts that compete with the protected synthetic circuit for limiting resources, yielding an increase in protected gene protein synthesis. **(b)** MazF and protected mCherry (*mCherry-P*) were controlled by an arabinose or aTc-inducible promoter (top). Time-series measurements of total fluorescence normalized to the maximum steady-state value across conditions as a function of time for cell populations expressing unprotected mCherry (*mCherry-U*) or mCherry-P in the presence (5 ng/ml) or absence (0 ng/ml) of MazF. Cells were induced with 0.05% arabinose. Error bars represent 1 s.d. ( $n = 3$ ). **(c)** MazF induction ratio, defined as the ratio of expression of mCherry-X in the presence (5 ng/ml aTc) to absence (0 ng/ml aTc) of MazF following induction for 10 hr. Error bars represent 1 s.d. ( $n = 3$ ). **(d)** Sequence protection ratio, defined as the ratio of expression of mCherry-P to mCherry-U in the presence (5 ng/ml aTc) or absence (0 ng/ml aTc) of MazF. Cells were induced for 10 hr. Error bars represent 1 s.d. ( $n = 3$ ). **(e)** Heat-map of total fluorescence following 10 hr of induction across a range of arabinose and aTc concentrations.

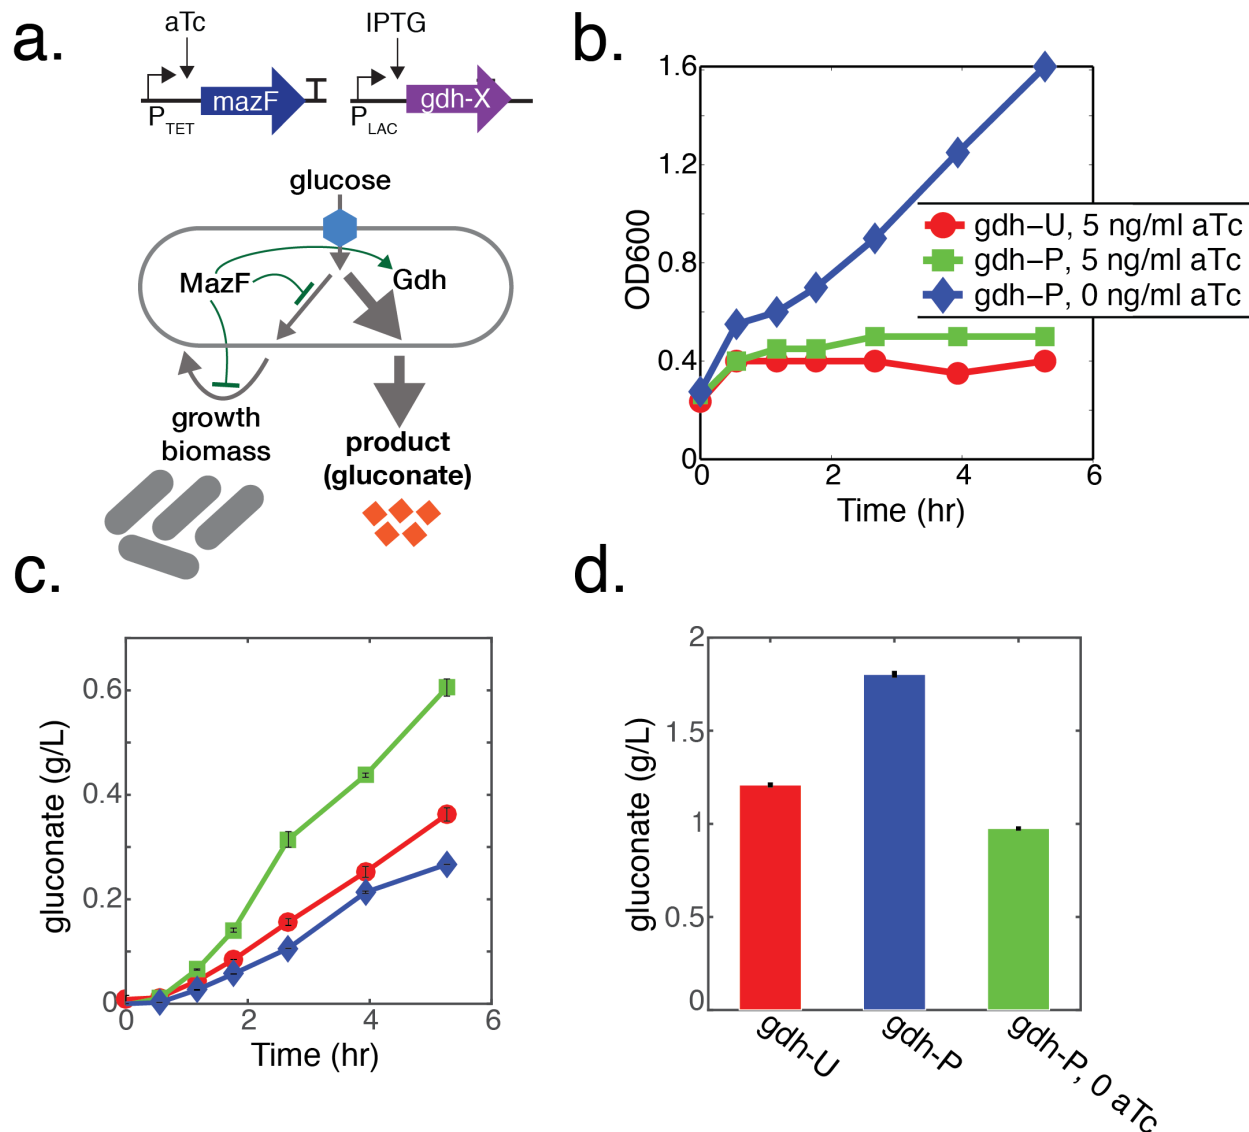

**Figure 2.** The MazF resource allocator enhanced gluconate production. **(a)** Schematic diagram of the circuit design (top) and gluconate metabolic pathway (bottom). Gdh transforms glucose into gluconate and competes directly with biomass synthesis. MazF and glucose dehydrogenase (gdh) were controlled by an aTc ( $P_{TET}$ ) or IPTG inducible ( $P_{LAC}$ ) promoter. **(b)** Schematic of gluconate circuit (top). OD600 as a function of time for cells expressing Gdh that contained 11 (Gdh-U) or 0 recognition sites (Gdh-P) in response to 5 ng/ml or 0 ng/ml aTc (below). All cultures were induced with 1 mM IPTG and supplemented with 1.5% glucose. **(c)** Gluconate titer as a function of time. Error bars represent 1 s.d. from the mean of three technical replicates ( $n=3$ ). **(d)** Gluconate titer following 18.25 hr of induction.

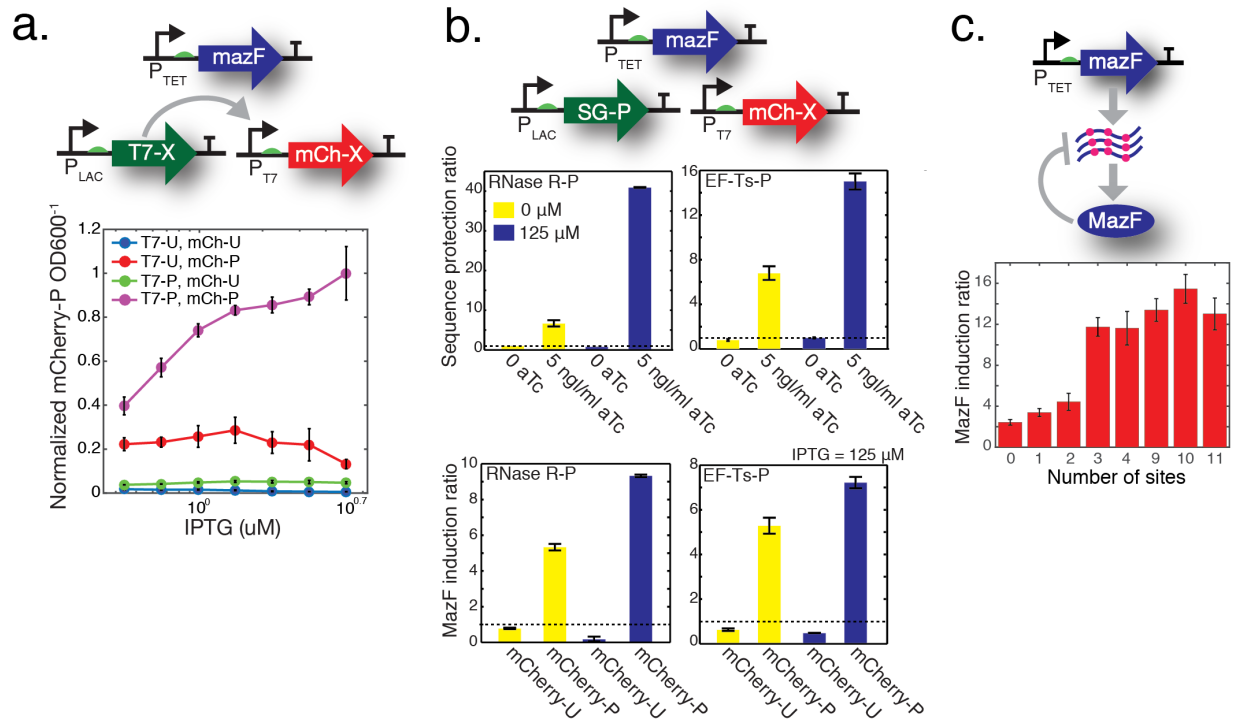

**Figure 3.** Optimization of the MazF resource allocator performance by protection of support genes and negative feedback loop strength. **(a)** Schematic of T7 polymerase circuit (top). MazF, T7-X and mCherry-X were controlled by an aTc ( $P_{TET}$ ), IPTG ( $P_{LAC}$ ) or T7 ( $P_{T7}$ ) regulated promoter. Unprotected T7 (T7-U) contained 50 sites. Normalized fluorescence as a function of IPTG for cells expressing all combinations of T7-U, T7-P, mCherry-U and mCherry-P following 8.3 hours of induction (bottom). Error bars represent 1 s.d. ( $n = 3$ ). **(b)** Schematic of support gene circuit (top). MazF, protected support gene (SG-P) and mCherry-X were controlled by  $P_{TET}$ ,  $P_{LAC}$  or  $P_{BAD}$ . Sequence protection ratio (middle) for cells in the presence or absence of IPTG or aTc. Cells were induced for 8.3 hr. MazF induction ratio (bottom) in the presence (5 ng/ml aTc, 125 μM IPTG) or absence (0 ng/ml aTc, 0 ng/ml IPTG) of IPTG or aTc. Cells were induced with 0.05% arabinose for 8.3 hr. Error bars represent 1 s.d. ( $n = 4$ ). **(c)** Schematic of MazF mRNA-decay feedback loop (top). MazF induction ratio for cells expressing *mazF* transcripts that varied in the number of recognition sites ( $P_{37-43}$  in Supplementary Table I). Cells were induced with 0 or 5 ng/ml aTc and 0.05% arabinose for 9.2 hr. Error bars represent 1 s.d. ( $n = 4$ ).



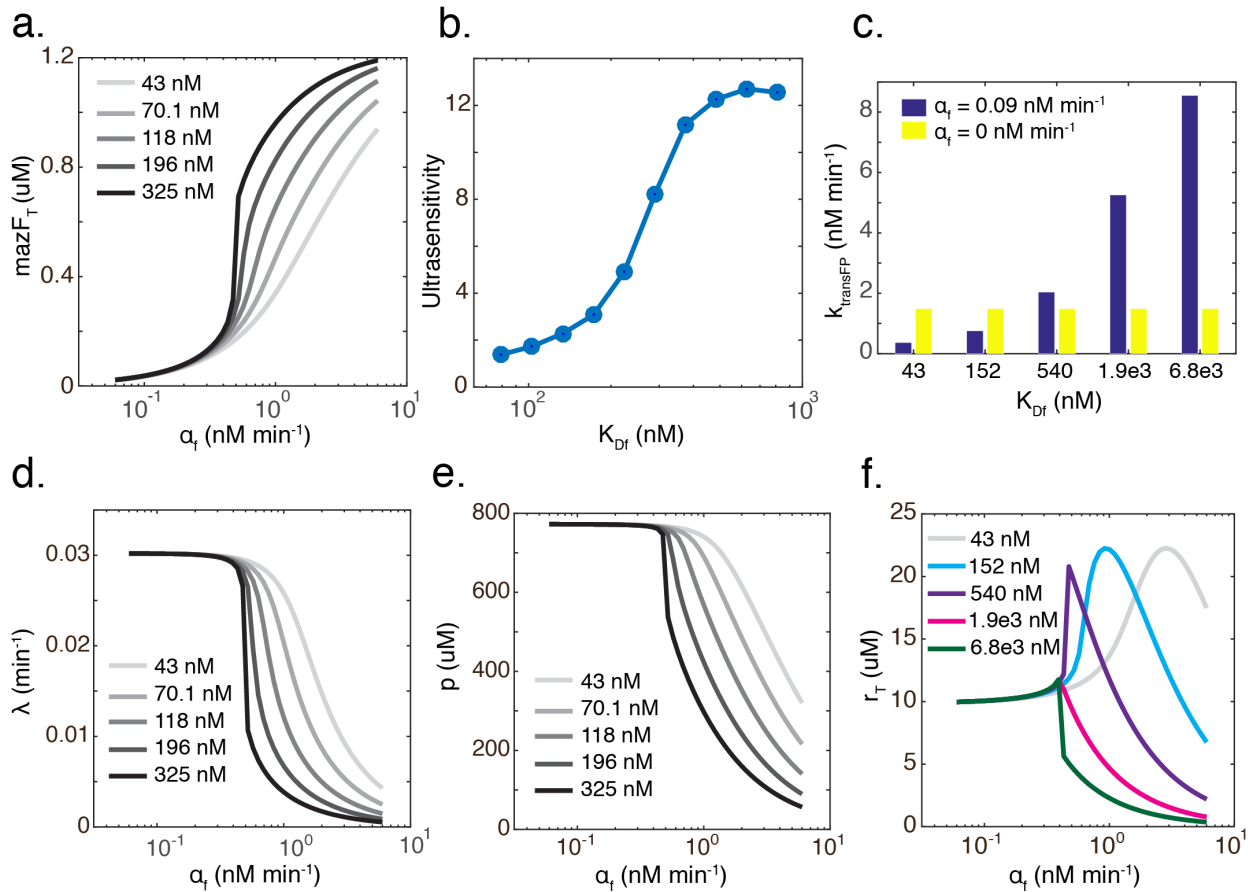

**Figure 4.** A dynamic resource allocation model demonstrates that the MazF mRNA-decay feedback loop established proportional control of the concentration of steady-state MazF. **(a)** Total MazF concentration at steady-state ( $mazF_T$ ,  $t = 278$  hr) as a function of the transcription rate of *mazF* ( $\alpha_f$ ) across a range of dissociation constants ( $K_{Df}$ ) of MazF to *mazF* mRNA ( $m_f$ ). **(b)** Maximum logarithmic sensitivity (ultrasensitivity) of the dose response of  $\alpha_f$  vs.  $mazF_T$  across a range of  $K_{Df}$  values. **(c)** Steady-state translation rate of a protected reporter gene FP ( $k_{transFP}$ ) as a function of  $K_{Df}$  in the presence ( $\alpha_f = 0.09$  nM min<sup>-1</sup>) or absence ( $\alpha_f = 0$  nM min<sup>-1</sup>) of MazF. **(d)** Steady-state growth rate ( $\lambda$ ) as a function of  $\alpha_f$  for different values of  $K_{Df}$ . **(e)** Steady-state unprotected proteome ( $p$ ) concentration as a function of  $\alpha_f$  for different values of  $K_{Df}$ . **(f)** Steady-state total ribosome concentration ( $r_T$ ) as a function of  $\alpha_f$  for different values of  $K_{Df}$ .

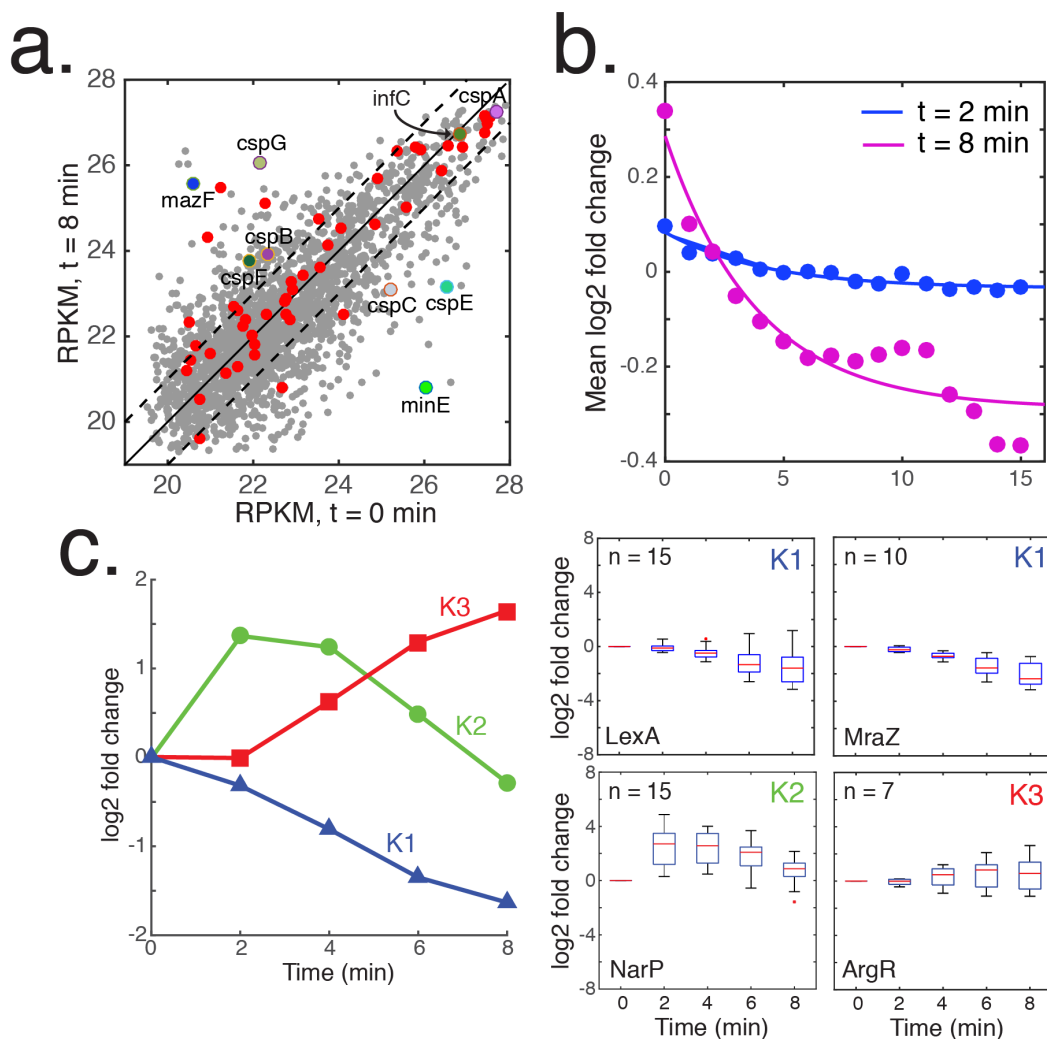

**Figure 5.** Time-series RNA-seq measurements of MazF-induced cells identified the relationship between transcript abundance and the number of MazF recognition sites and provided insight into physiological impact of MazF expression. **(a)** Scatter plot of RPKM measurements prior to induction with MazF vs. induction with MazF (5 ng/ml aTc) for 8 min. Gray and red data points denote unprotected or protected transcripts larger than 80 nucleotides. Dashed lines represent a two-fold threshold in transcript abundance. *cspABCDEF*, *mazF* and *minE* transcripts are highlighted. **(b)** Scatter plot of the number of *mazF* sites for each gene vs. mean  $\log_2$  fold change following induction with 5 ng/ml aTc for 2 or 8 min. A 5-point moving average was applied to the data. Lines represent fitted exponential functions to the data. **(c)** K-means clustering of  $\log_2$  fold change of genes (left) that exhibited correlated dynamics between biological replicates ( $n = 939$ ). Box plots (right) of representative functional or regulatory enrichments in the K1, K2 and K3 clusters according to the Fisher's exact test ( $p < 0.05$ ). On each box, the red line indicates the median, the bottom and top edges represent the 25<sup>th</sup> and 75<sup>th</sup> percentiles and '+' denote outlier data points.
